# Supplementary material for: Impact of HVT Vaccination on Splenic miRNA Expression in Marek’s Disease Virus Infections
Source: Genes (Basel). 2019 Feb 5;10(2):115. doi: 10.3390/genes10020115 (PMC6409792; doi:10.3390/genes10020115)
Supplement: Supplementary file 1 [file genes-10-00115-s001.zip › Table S1.xlsx]

## Sheet: Sheet1
Table S1. Primers used in this study
miR10a-Abai-HindIII-F	gataagcttGGCGCTGCCCTCTGCTCCAG
miR10a-Abai-XhoI-R	atcgctcgagCCTGGCTTATTTAAGCCTCCT
miR30d-Abai-HindIII-F	gataagcttTTCCTGGAAGCAGAAAACTTC
miR30d-Abai-XhoI-R	atcgctcgagTTAATGTTTCTAAATGCAAGA
gga-IRF4-756F	TGGTTGTCAGGTGACAGGAAC
gga-IRF4-872R	CGACAATCTGACAGGGCGAG
gga-PRMT5-1272F	CAAGCTGTACAATGAGGTGCG
gga-PRMT5-1378R	CCGCCAACTGGTGGAAGTTA
gga-ZEB1-705F	ACGCAGTCCAGTGGTAATCG
gga-ZEB1-812R	TGGCTTCTCTCCACTGTGAAT
gga-STAT4-19F	GGACCACTCGTACAGCATGTC
gga-STAT4-136R	CAGCAGATGCCGGATTTCCA
gga-IRF2-540F	ATTGTAGTTGTAGGACAGCCGC
gga-IRF2-657R	GAGGCTGCTCATCGCTTTCT
gga-ARID3B-1480F	GGCAAGGAAGACAAACCCGA
gga-ARID3B-1581R	GCCGTTAATCTCCACCGACA
gga-DMXL1-7320F	AGTCCTACCAAGTCTGCAGATGA
gga-DMXL1-7409R	TGCCTGAGAACTCTCTTTCGG
gga-ZNF507-2313F	CATGAGAGAGAGCAACACGGT
gga-ZNF507-2422R	TGAACTGAAGACTTACTTCCTTCTC
gga-TGIF1-177F	CTCGTCGCCGAGTTGAGAAG
gga-TGIF1-284R	GCCTGATATTGCAACTACACCTT
gga-RPL4-391-F	GCACCGCAGAGTGAACGTAA
gga-RPL4-496-R	CTCCTCAATGCGGTGACCTTT
MDV-MEQ-5757F	ACCACCAGACCGTAGACTGA
MDV-MEQ-5864R	CGGAGAGGCTTTATGCTCGT
HVT-HVT071-117346F	ATCCCGTAACTGTAGCGCC
HVT-HVT071-117545R	TCATTTCTCGCCGGAACCTT
